# Supplementary material
Source: Springer Nature journal article supplement (https://www.springermedizin.de/resource/supplementary/12875_2008_382_MOESM1_ESM.pdf/9434498)
Supplement: MOESM1 [file 9434498]

National database of patients attending GPs for methadone treatment (n=2585)

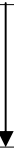

Total randomly sampled from national database (n=634)

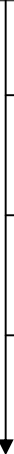

Patients not invited to participate because GP did not respond (n=317)

Patients not invited to participate because GP declined to participate (n=28)

Patients not invited to participate because they were no longer attending practice at time of recruitment (n=13)

Patients invited to participate in study (n=276)

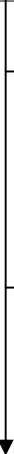

Patient declined to participate (n=69)

Patient agreed to participate but declined to meet researcher / attend for interview (n=11)

Patients interviewed (n=196)
